# Supplementary material for: Metabolic and Molecular Subacute Effects of a Single Moderate-Intensity Exercise Bout, Performed in the Fasted State, in Obese Male Rats
Source: MDPI journal article supplement (doi:10.3390/ijerph18147543), 2021-07-15
Supplement: s1 [file s1]

Supplemental Material

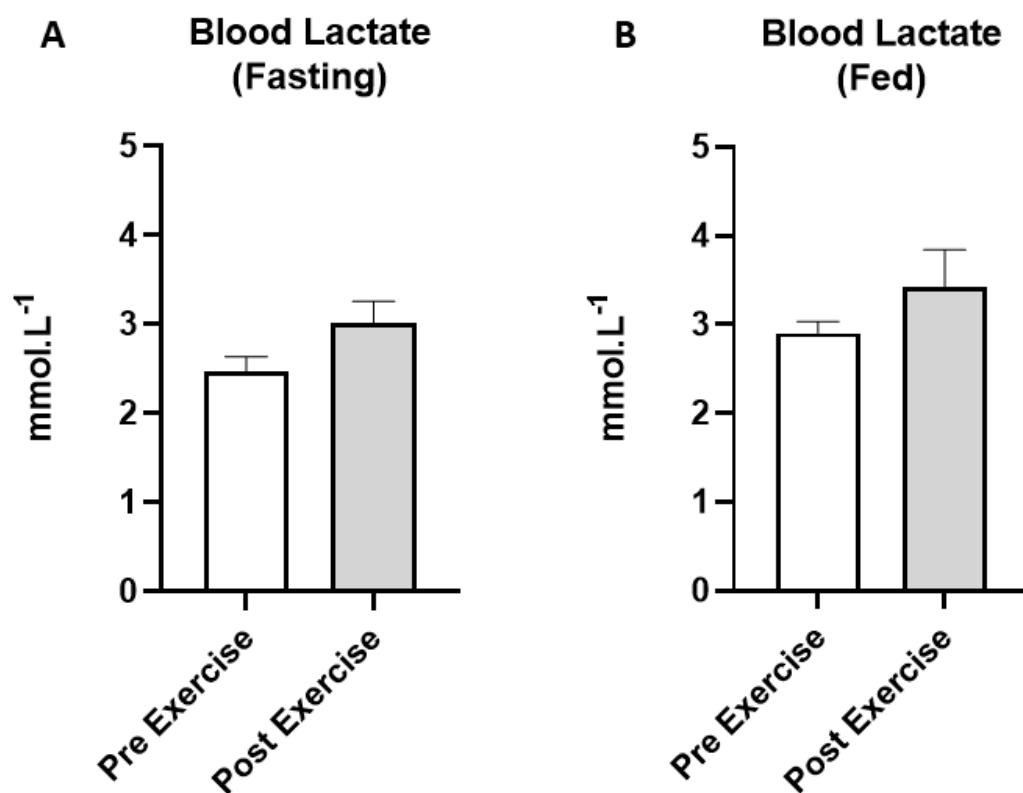

**Figure S1.** Blood lactate concentration in fasting (A) and fed (B) conditions of the rats before and after the exercise protocol. Data was analyzed by repeated *t* test. Results were considered different when  $p < 0.05$ .

**Table S1.** Results were expressed as mean  $\pm$  standard error or median (25–75 percentiles). Data were analyzed by two-way ANOVA (Bonferroni post hoc), or Kruskal-Wallis. Results were considered statistically different when  $p < 0.05$ .  $p1$ : statistical index for exercise (rest or exercise).  $p2$ : statistical index for fasting (fed or fasted).  $p3$ : statistical index for the interaction between exercise and fasting. Letters represent significant differences between each experimental group. Bold: significant differences.

| Effects of fasting exercise on plasma biochemical profile, glycogen, lactate, triglycerides storage and muscle immunocontent of HSP70 and SIRT-1 |                             |                               |                               |                               |             |             |             |
|--------------------------------------------------------------------------------------------------------------------------------------------------|-----------------------------|-------------------------------|-------------------------------|-------------------------------|-------------|-------------|-------------|
|                                                                                                                                                  | Rest                        |                               | Exercise                      |                               | $p1$        | $p2$        | $p3$        |
|                                                                                                                                                  | Fed (n=8)                   | Fasting (n=8)                 | Fed (n=7)                     | Fasting (n=7)                 |             |             |             |
| Serum Glucose (mg.dL <sup>-1</sup> )                                                                                                             | 91.3 $\pm$ 8.53             | 90.9 $\pm$ 11.3               | 91.2 $\pm$ 10.7               | 79.8 $\pm$ 9.03               | 0.15        | 0.12        | 0.15        |
| Serum Total Proteins (g.dL <sup>-1</sup> )                                                                                                       | 12.5 (11.8 - 12.7) <b>a</b> | 13.4 (11.7 - 14.2) <b>a</b>   | 12.2 (11.7 - 12.9) <b>a</b>   | 10.9 (10.7 - 11.6) <b>b</b>   | -           | -           | <b>0.01</b> |
| Serum Lactate (mmol.L <sup>-1</sup> )                                                                                                            | 8.27 $\pm$ 1.38             | 8.53 $\pm$ 1.29               | 7.91 $\pm$ 1.51               | 7.76 $\pm$ 0.81               | 0.25        | 0.89        | 0.67        |
| Serum Total Cholesterol (mg.dL <sup>-1</sup> )                                                                                                   | 83.8 $\pm$ 17.8 <b>a</b>    | 104.4 $\pm$ 36.4 <b>a</b>     | 86.4 $\pm$ 23.7 <b>a</b>      | 46.9 $\pm$ 7.74 <b>b</b>      | <b>0.01</b> | 0.31        | <b>0.01</b> |
| Serum Triglycerides (mg.dL <sup>-1</sup> )                                                                                                       | 193.7 $\pm$ 77.6            | 248.7 $\pm$ 107.2             | 173.7 $\pm$ 89.6              | 69.9 $\pm$ 11.5               | <b>0.01</b> | 0.43        | <b>0.02</b> |
| Gastrocnemius Glycogen (mg.g of tissue <sup>-1</sup> )                                                                                           | 0.37 (0.21 - 2.34)          | 0.27 (0.19 - 0.68)            | 0.43 (0.34 - 2.73)            | 0.27 (0.16 - 0.36)            | -           | -           | 0.23        |
| Soleus Glycogen (mg.g of tissue <sup>-1</sup> )                                                                                                  | 1.41 $\pm$ 0.69             | 0.40 $\pm$ 0.18               | 1.36 $\pm$ 0.76               | 0.58 $\pm$ 0.38               | 0.77        | <b>0.01</b> | 0.58        |
| Hepatic Glycogen (mg.g of tissue <sup>-1</sup> )                                                                                                 | 73.4 (60.6 - 80.2) <b>a</b> | 57.3 (38.3 - 77.3) <b>a,b</b> | 29.3 (24.1 - 62.3) <b>b</b>   | 47.5 (34.2 - 54.4) <b>a,b</b> | -           | -           | <b>0.03</b> |
| Heart Glycogen (mg.g of tissue <sup>-1</sup> )                                                                                                   | 0.04 $\pm$ 0.02             | 0.04 $\pm$ 0.03               | 0.03 $\pm$ 0.02               | 0.04 $\pm$ 0.01               | 0.96        | 0.35        | 0.39        |
| Gastrocnemius Lactate (mg.g of tissue <sup>-1</sup> )                                                                                            | 4.16 (1.33 - 6.42)          | 3.28 (0.84 - 5.41)            | 1.29 (0.87 - 4.65)            | 5.54 (2.74 - 6.29)            | -           | -           | 0.29        |
| Soleus Lactate (mg.g of tissue <sup>-1</sup> )                                                                                                   | 2.50 $\pm$ 0.76             | 2.00 $\pm$ 0.79               | 2.53 $\pm$ 1.52               | 2.65 $\pm$ 0.35               | 0.36        | 0.60        | 0.39        |
| Hepatic Lactate (mg.g of tissue <sup>-1</sup> )                                                                                                  | 0.94 $\pm$ 0.23             | 1.13 $\pm$ 0.31               | 1.22 $\pm$ 0.33               | 1.13 $\pm$ 0.56               | 0.30        | 0.71        | 0.31        |
| Gastrocnemius Triglycerides (mg.g of tissue <sup>-1</sup> )                                                                                      | 2.38 $\pm$ 0.84             | 2.37 $\pm$ 0.52               | 2.78 $\pm$ 0.79               | 2.61 $\pm$ 0.56               | 0.27        | 0.77        | 0.78        |
| Soleus Triglycerides (mg.g of tissue <sup>-1</sup> )                                                                                             | 2.93 (2.60 - 3.56) <b>a</b> | 2.34 (2.20 - 2.94) <b>b</b>   | 2.56 (2.35 - 2.72) <b>a,b</b> | 2.42 (2.01 - 3.01) <b>b</b>   | -           | -           | <b>0.04</b> |
| Hepatic Triglycerides (mg.g of tissue <sup>-1</sup> )                                                                                            | 14.7 $\pm$ 3.29             | 13.2 $\pm$ 2.33               | 13.2 $\pm$ 4.65               | 14.0 $\pm$ 4.15               | 0.83        | 0.79        | 0.41        |
| Heart Triglycerides (mg.g of tissue <sup>-1</sup> )                                                                                              | 4.67 $\pm$ 0.38 <b>a</b>    | 5.25 $\pm$ 0.51 <b>b</b>      | 5.46 $\pm$ 0.62 <b>b</b>      | 4.52 $\pm$ 0.44 <b>a</b>      | 0.88        | 0.33        | <b>0.00</b> |
| Gastrocnemius HSP70 (AU)                                                                                                                         | 0.30 $\pm$ 0.09             | 0.30 $\pm$ 0.09               | 0.42 $\pm$ 0.10               | 0.48 $\pm$ 0.17               | <b>0.00</b> | 0.56        | 0.48        |
| Soleus HSP70 (AU)                                                                                                                                | 0.40 $\pm$ 0.06             | 0.29 $\pm$ 0.05               | 0.52 $\pm$ 0.04               | 0.49 $\pm$ 0.16               | <b>0.00</b> | 0.05        | 0.25        |
| Gastrocnemius SIRT-1 (AU)                                                                                                                        | 0.25 $\pm$ 0.13             | 0.28 $\pm$ 0.11               | 0.38 $\pm$ 0.04               | 0.48 $\pm$ 0.27               | <b>0.01</b> | 0.26        | 0.52        |
| Soleus SIRT-1 (AU)                                                                                                                               | 0.38 $\pm$ 0.07             | 0.28 $\pm$ 0.13               | 0.40 $\pm$ 0.09               | 0.48 $\pm$ 0.19               | <b>0.02</b> | 0.87        | 0.05        |
